# Supplementary material
Source: MDPI journal article supplement (https://www.mdpi.com/2674-0311/2/4/24)
Supplement: s1 [file s1]

**Supplemental Table S1. Samples menus of food provided to participants.** Sample menus based on a 2000 kcal diet for the standard diet (A-C), high carbohydrate diet (D-G), and high fat diet (H-K). Food, amount, calories, and grams of protein, fat, saturated fat, and carbohydrates are reported. Participants may drink non-caloric beverages of their choice in each of the diets.

**A) Sample Standard Menu #1**

| FOOD                   | AMOUNT        | CALORIES | PROTEIN (g) | FAT (g) | SATURATED FAT (g) | CARB (g) |
|------------------------|---------------|----------|-------------|---------|-------------------|----------|
| <b>Breakfast</b>       |               |          |             |         |                   |          |
| Rice Chex              | 1 bowl        | 70       | 1           | 0       | 0                 | 16       |
| 2% milk                | 240 mL        | 113      | 7.6         | 4.4     | 2.7               | 11       |
| Strawberry yogurt      | 6 oz. carton  | 160      | 5           | 1.5     | 0                 | 33       |
| Banana                 | 1 medium      | 111      | 1.2         | 0.6     | 0                 | 28       |
| <b>Lunch</b>           |               |          |             |         |                   |          |
| Pepperoni pizza        | 1 unit        | 381      | 19.1        | 14.1    | 7.5               | 42       |
| Applesauce             | 1 container   | 51       | 0.2         | 0.1     | 0                 | 13       |
| Trail mix              | 1 package     | 290      | 8           | 18      | 4.5               | 27       |
| <b>Dinner</b>          |               |          |             |         |                   |          |
| Chicken primavera      | 325 g         | 346      | 29.4        | 8.5     | 3.3               | 38       |
| Butter in primavera    | 10 g          | 72       | 0           | 8       | 5.2               | 0        |
| Cream of broccoli soup | 168 g         | 137      | 4.8         | 7.3     | 2.3               | 14       |
| Butter in soup         | 10 g          | 72       | 0           | 8       | 5.2               | 0        |
| Chocolate chip cookie  | 1 unit (36 g) | 160      | 2           | 8       | 4                 | 23       |
| <b>Summary</b>         |               |          |             |         |                   |          |
| Provided               |               | 1963     | 78          | 79      | 35                | 245      |
| Percentage of calories |               |          | 16%         | 36%     | 16%               | 50%      |
| Goal                   |               | 2000     | 76          | 78      | 39                | 250      |
| Percentage of calories |               |          | 15%         | 35%     | 18%               | 50%      |

**B) Sample Standard Menu #2**

| FOOD                                         | AMOUNT       | CALORIES | PROTEIN (g) | FAT (g) | SATURATED FAT (g) | CARB (g) |
|----------------------------------------------|--------------|----------|-------------|---------|-------------------|----------|
| <b>Breakfast</b>                             |              |          |             |         |                   |          |
| Breakfast sandwich                           | 1            | 251      | 19.6        | 7.9     | 4.5               | 25       |
| Orange juice                                 | 2 cartons    | 122      | 0           | 0       | 0                 | 28       |
| Clementine                                   | 1            | 50       | 0.7         | 0.2     | 0                 | 13       |
| Raisins                                      | 30 g         | 94       | 0.8         | 0       | 0                 | 25       |
| <b>Lunch</b>                                 |              |          |             |         |                   |          |
| Sliced turkey                                | 40 g         | 48       | 12          | 0       | 0                 | 0        |
| Mayonnaise-light                             | 2 packets    | 50       | 0           | 5       | 0                 | 0        |
| Tomato                                       | 3 slices     | 12       | 0.5         | 0.2     | 0                 | 3        |
| Potato chips                                 | 1 bag (28 g) | 160      | 2           | 11      | 3                 | 15       |
| String cheese                                | 2 sticks     | 160      | 12          | 12      | 7                 | 0        |
| White bread                                  | 1 slice      | 83       | 2.5         | 0.5     | 0                 | 16       |
| Lemonheads                                   | 2 boxes      | 180      | 0           | 0       | 0                 | 44       |
| <b>Dinner</b>                                |              |          |             |         |                   |          |
| Macaroni and cheese                          | 120 g        | 231      | 10          | 13.8    | 7.8               | 16       |
| BBQ chicken breast                           | 60 g         | 75       | 10          | 2.1     | 0.2               | 4        |
| Garden medley vegetables                     | 112 g        | 42       | 1.7         | 0       | 0                 | 8        |
| Butter in macaroni and cheese and vegetables | 5 g          | 36       | 0           | 4       | 2.6               | 0        |
| Donut chocolate                              | 1 unit       | 365      | 3.3         | 20.7    | 8.4               | 42       |
| <b>Summary</b>                               |              |          |             |         |                   |          |
| Provided                                     |              | 2042     | 78          | 78      | 33                | 255      |
| Percentage of calories                       |              |          | 15%         | 34%     | 15%               | 50%      |
| Goal                                         |              | 2000     | 76          | 78      | 39                | 250      |
| Percentage of calories                       |              |          | 15%         | 35%     | 18%               | 50%      |

**C) Sample Standard Menu #3**

| FOOD                   | AMOUNT       | CALORIES | PROTEIN (g) | FAT (g) | SATURATED FAT (g) | CARB (g) |
|------------------------|--------------|----------|-------------|---------|-------------------|----------|
| <b>Breakfast</b>       |              |          |             |         |                   |          |
| Pancakes               | 2            | 126      | 2.8         | 1.1     | 0.4               | 26       |
| Pancake syrup          | 1 packet     | 120      | 0           | 0       | 0                 | 30       |
| Butter on pancakes     | 10 g         | 72       | 0           | 8       | 5.2               | 0        |
| Orange juice           | 1 carton     | 61       | 0           | 0       | 0                 | 14       |
| Omelet with cheese     | 1 package    | 288      | 20.2        | 21      | 7.3               | 6        |
| <b>Lunch</b>           |              |          |             |         |                   |          |
| Garden burger          | 1 patty      | 180      | 5.1         | 9.5     | 1                 | 21       |
| White bun              | 1 unit       | 110      | 3           | 2       | 0                 | 21       |
| Mayonnaise-light       | 2 packets    | 50       | 0           | 5       | 0                 | 0        |
| Cheddar cheese         | 23 g         | 84       | 5.3         | 7.3     | 4.6               | 0        |
| Potato chips           | 1 bag (28 g) | 160      | 2           | 11      | 3                 | 15       |
| Banana                 | medium       | 111      | 1.2         | 0.6     | 0                 | 28       |
| <b>Dinner</b>          |              |          |             |         |                   |          |
| Chicken parmesan       | 157 g        | 233      | 27.6        | 7.7     | 1.9               | 13       |
| Penne                  | 98 g         | 159      | 5.3         | 0.8     | 0                 | 32       |
| Marinara sauce         | 56 g         | 24       | 1           | 0.4     | 0                 | 4        |
| White roll             | 28 g         | 80       | 2.5         | 1       | 0.5               | 15       |
| Butter for roll        | 5 g          | 36       | 0           | 4       | 2.6               | 0        |
| Raspberry sherbet      | 1 carton     | 120      | 0           | 1.5     | 1                 | 27       |
| <b>Summary</b>         |              |          |             |         |                   |          |
| Provided               |              | 2014     | 76          | 81      | 28                | 252      |
| Percentage of calories |              |          | 15%         | 36%     | 12%               | 50%      |
| Goal                   |              | 2000     | 76          | 78      | 39                | 250      |
| Percentage of calories |              |          | 15%         | 35%     | 18%               | 50%      |

**D) Sample High Carbohydrate Menu #1**

| <b>FOOD</b>                                                         | <b>AMOUNT</b> | <b>CALORIES</b> | <b>PROTEIN (g)</b> | <b>FAT (g)</b> | <b>SATURATED<br/>FAT (g)</b> | <b>CARB (g)</b> |
|---------------------------------------------------------------------|---------------|-----------------|--------------------|----------------|------------------------------|-----------------|
| <b>Breakfast</b>                                                    |               |                 |                    |                |                              |                 |
| Frosted Flakes                                                      | 1 bowl        | 110             | 1                  | 0              | 0                            | 26              |
| Skim milk                                                           | 236 g carton  | 79              | 7.7                | 0.4            | 0.3                          | 11              |
| Fat free strawberry yogurt                                          | 170 g carton  | 90              | 6                  | 0              | 0                            | 17              |
| Apple juice                                                         | 4 oz carton   | 61              | 0                  | 0              | 0                            | 15              |
| <b>Lunch</b>                                                        |               |                 |                    |                |                              |                 |
| Chicken noodle soup                                                 | 206 g         | 50              | 3                  | 0              | 0.5                          | 8               |
| Fresh cut vegetables                                                | 96 g          | 21              | 0.7                | 0.3            | 0                            | 5               |
| Ranch dressing                                                      | 30 g          | 44              | 0.8                | 3.4            | 1                            | 2.8             |
| Grilled chicken breast                                              | 67 g          | 85              | 15.5               | 2.4            | 0.2                          | 0               |
| Lettuce leaf                                                        | 15 g          | 4               | 0                  | 0              | 0                            | 0.4             |
| Wheat bun                                                           | 1 unit        | 145             | 7                  | 1              | 0                            | 28              |
| Butter on bun                                                       | 5 g           | 36              | 0                  | 4              | 2.6                          | 0               |
| Ginger ale                                                          | 8 oz can      | 96              | 0                  | 0              | 0                            | 26              |
| Banana                                                              | small         | 90              | 1.1                | 0.3            | 0.1                          | 23              |
| <b>Dinner</b>                                                       |               |                 |                    |                |                              |                 |
| Lasagna                                                             | 78 g          | 118             | 9                  | 5.4            | 3                            | 7               |
| Grape juice                                                         | 2 cartons     | 122             | 0                  | 0              | 0                            | 30              |
| Tossed greens                                                       | 116 g         | 16              | 1.2                | 0.2            | 0                            | 3               |
| Raisins in salad                                                    | 32 g          | 90              | 0.9                | 0.1            | 0                            | 24              |
| Fat free Italian dressing                                           | 22 g          | 10              | 0                  | 0              | 0                            | 2               |
| Garden vegetable medley                                             | 113 g         | 42              | 1.7                | 0              | 0                            | 8               |
| Lemon ice                                                           | 23 g carton   | 80              | 0                  | 0              | 0                            | 20              |
| Sliced peaches                                                      | 140 g         | 66              | 0                  | 0              | 0                            | 14.9            |
| <b>Snacks</b>                                                       |               |                 |                    |                |                              |                 |
| Smoothie with banana, honey,<br>coconut, juice, protein, and yogurt | 240 g         | 243             | 9.6                | 5.1            | 3.6                          | 43              |
| Skim milk                                                           | 236 g carton  | 79              | 7.7                | 0.4            | 0.3                          | 11              |

|                                                  |             |      |     |     |    |     |
|--------------------------------------------------|-------------|------|-----|-----|----|-----|
| Vanilla Carnation Instant Breakfast,<br>no sugar | 20 g packet | 70   | 5   | 0   | 0  | 12  |
| Unsalted crackers                                | 2 packages  | 50   | 2   | 0   | 0  | 10  |
| Grape jelly                                      | 3 packets   | 105  | 0   | 0   | 0  | 27  |
| <b>Summary</b>                                   |             |      |     |     |    |     |
| Provided                                         |             | 2006 | 80  | 23  | 12 | 374 |
| Percentage of calories                           |             |      | 16% | 11% | 5% | 75% |
| Goal                                             |             | 2000 | 77  | 22  | 11 | 375 |
| Percentage of calories                           |             |      | 15  | 10  | 5  | 75  |

**E) Sample High Carbohydrate Menu #2**

| FOOD                                                             | AMOUNT       | CALORIES | PROTEIN (g) | FAT (g) | SATURATED FAT (g) | CARB (g) |
|------------------------------------------------------------------|--------------|----------|-------------|---------|-------------------|----------|
| <b>Breakfast</b>                                                 |              |          |             |         |                   |          |
| Orange juice                                                     | 1 carton     | 61       | 0           | 0       | 0                 | 14       |
| Oatmeal                                                          | 142 g        | 92       | 2.7         | 1.8     | 0                 | 17       |
| Raisins                                                          | 35 g         | 110      | 1           | 0.2     | 0                 | 27       |
| Brown sugar                                                      | 18 g         | 68       | 0           | 0       | 0                 | 17.7     |
| Skim milk                                                        | 8 oz carton  | 79       | 7.7         | 0.4     | 0.3               | 11       |
| <b>Lunch</b>                                                     |              |          |             |         |                   |          |
| Tuna salad                                                       | 68 g         | 88       | 13          | 3.5     | 0.4               | 1.7      |
| Wheat bread                                                      | 2 slices     | 146      | 8           | 0.6     | 0                 | 28       |
| Pretzels                                                         | 28 g         | 110      | 2           | 1       | 0                 | 23       |
| Clementine                                                       | 1            | 50       | 0.7         | 0.2     | 0                 | 13       |
| Lemon ice                                                        | 23 g carton  | 80       | 0           | 0       | 0                 | 20       |
| Soft drink                                                       | 8 oz can     | 90       | 0           | 0       | 0                 | 24       |
| <b>Dinner</b>                                                    |              |          |             |         |                   |          |
| Chili                                                            | 160 g        | 137      | 8.5         | 3.8     | 1.5               | 16       |
| Baked potato                                                     | 250 g        | 247      | 5.2         | 0.2     | 0.1               | 57       |
| Butter on potato                                                 | 4 g          | 29       | 0           | 3.3     | 2.1               | 0        |
| Sour cream                                                       | 1/3 packet   | 20       | 0.3         | 1.7     | 1                 | 0.7      |
| Raspberry sherbet                                                | 1 carton     | 120      | 0           | 1.5     | 1                 | 27       |
| Skim milk                                                        | 236 g carton | 79       | 7.7         | 0.4     | 0.3               | 11       |
| <b>Snacks</b>                                                    |              |          |             |         |                   |          |
| Smoothie with banana, honey, coconut, juice, protein, and yogurt | 240 g        | 243      | 9.6         | 5.1     | 3.6               | 43       |
| Skim milk                                                        | 236 g carton | 79       | 7.7         | 0.4     | 0.3               | 11       |
| Vanilla Carnation Instant Breakfast, no sugar                    | 20 g packet  | 70       | 5           | 0       | 0                 | 12       |
| <b>Summary</b>                                                   |              |          |             |         |                   |          |
| Provided                                                         |              | 2002     | 79          | 24      | 11                | 375      |
| Percentage of calories                                           |              |          | 16%         | 11%     | 5%                | 75%      |

|                        |      |     |     |    |     |
|------------------------|------|-----|-----|----|-----|
| Goal                   | 2000 | 77  | 22  | 11 | 375 |
| Percentage of calories |      | 15% | 10% | 5% | 75% |

**F) Sample High Carbohydrate Menu #3**

| FOOD                      | AMOUNT       | CALORIES | PROTEIN (g) | FAT (g) | SATURATED FAT (g) | CARB (g) |
|---------------------------|--------------|----------|-------------|---------|-------------------|----------|
| <b>Breakfast</b>          |              |          |             |         |                   |          |
| Raisin Bran               | 1 bowl       | 126      | 3           | 1       | 0                 | 27       |
| Extra raisins in cereal   | 32 g         | 90       | 0.9         | 0.1     | 0                 | 24       |
| Honey                     | 2 packets    | 60       | 0           | 0       | 0                 | 16       |
| Skim milk                 | 236 g carton | 79       | 7.7         | 0.4     | 0.3               | 11       |
| Clementine                | 1            | 50       | 0.7         | 0.2     | 0                 | 13       |
| Grape juice               | 1 carton     | 61       | 0           | 0       | 0                 | 15       |
| <b>Lunch</b>              |              |          |             |         |                   |          |
| White bread bun           | 1 unit       | 114      | 3           | 2       | 0                 | 21       |
| Sliced ham                | 57 g         | 50       | 9           | 1.5     | 0.5               | 1        |
| Sliced turkey             | 33 g         | 40       | 9.7         | 0       | 0                 | 0        |
| Leaf lettuce              | 15 g         | 4        | 0           | 0       | 0                 | 0.4      |
| American cheese           | 17 g         | 51       | 2.6         | 4.3     | 2.6               | 0.9      |
| Hellmans light mayonnaise | 6 g          | 13       | 0           | 1.4     | 0                 | 0.2      |
| Pretzels                  | 28 g package | 110      | 2           | 1       | 0                 | 23       |
| Grapes                    | 120 g        | 83       | 0.9         | 0.2     | 0                 | 21       |
| Raspberry sherbet         | 1 carton     | 120      | 0           | 1.5     | 1                 | 27       |
| Skim milk                 | 236 g carton | 79       | 7.7         | 0.4     | 0.3               | 11       |
| <b>Dinner</b>             |              |          |             |         |                   |          |
| Penne pasta               | 99 g         | 160      | 5.3         | 0.8     | 0                 | 32       |
| Marinara sauce            | 113 g        | 48       | 2           | 0.8     | 0                 | 8        |
| Parmesan cheese           | 1 packet     | 15       | 1.3         | 1       | 0.6               | 0        |
| Green beans               | 90 g         | 25       | 1.4         | 0.2     | 0                 | 6        |
| Tossed greens             | 116 g        | 16       | 1.2         | 0.2     | 0                 | 3        |
| Fat free Italian dressing | 22 g         | 10       | 0           | 0       | 0                 | 2        |
| Orange jello              | 1 carton     | 73       | 1.5         | 0       | 0                 | 17       |
| Soft drink                | 1 can        | 95       | 0           | 0       | 0                 | 24       |
| Banana                    | small        | 90       | 1.1         | 0.3     | 0.1               | 23       |
| Unsweetened coconut       | 5 g          | 33       | 0.3         | 3.2     | 2.9               | 1.2      |

| Snacks                                           |              |      |     |     |     |     |
|--------------------------------------------------|--------------|------|-----|-----|-----|-----|
| Skim milk                                        | 236 g carton | 79   | 7.7 | 0.4 | 0.3 | 11  |
| Vanilla Carnation Instant Breakfast,<br>no sugar | 20 g packet  | 70   | 5   | 0   | 0   | 12  |
| Chocolate pudding                                | 1 carton     | 128  | 3   | 2   | 1.5 | 24  |
| Summary                                          |              |      |     |     |     |     |
| Provided                                         |              | 1976 | 77  | 23  | 10  | 375 |
| Percentage of calories                           |              |      | 16% | 10% | 5%  | 76% |
| Goal                                             |              | 2000 | 77  | 22  | 11  | 375 |
| Percentage of calories                           |              |      | 15% | 10% | 5%  | 75% |

**G) Sample High Carbohydrate Menu #4**

| FOOD                    | AMOUNT       | CALORIES | PROTEIN (g) | FAT (g) | SATURATED FAT (g) | CARB (g) |
|-------------------------|--------------|----------|-------------|---------|-------------------|----------|
| <b>Breakfast</b>        |              |          |             |         |                   |          |
| Omelet half serving     | 120 g        | 50       | 4.4         | 3.4     | 1.1               | 0.4      |
| Pancakes reduced sugar  | 2            | 126      | 2.8         | 1.1     | 0.4               | 26       |
| Pancake syrup           | 1 package    | 120      | 0           | 0       | 0                 | 30       |
| Skim milk               | 236 g carton | 79       | 7.7         | 0.4     | 0.3               | 11       |
| Orange juice            | 1 carton     | 60       | 0           | 0       | 0                 | 14       |
| <b>Lunch</b>            |              |          |             |         |                   |          |
| Cream of tomato soup    | 170 g bowl   | 113      | 4.6         | 3       | 1.8               | 17       |
| White bread             | 1 slice      | 83       | 2.5         | 0.5     | 0                 | 16       |
| Sliced ham              | 22 g         | 19       | 3.5         | 0.6     | 0.2               | 0.4      |
| Swiss cheese            | 15 g         | 56       | 3.6         | 4.6     | 3.1               | 0        |
| Pretzels                | 28 g         | 110      | 2           | 1       | 0                 | 23       |
| Apple juice             | 8 oz         | 122      | 0           | 0       | 0                 | 30       |
| Yogurt Greek strawberry | 140 g        | 121      | 11          | 0       | 0                 | 20.5     |
| Unsweetened coconut     | 5 g          | 33       | 0.3         | 3.2     | 2.9               | 1.2      |
| <b>Dinner</b>           |              |          |             |         |                   |          |
| BBQ sauce packet        | 2 packets    | 30       | 0           | 0       | 0                 | 8        |
| Grilled chicken breast  | 85 g         | 108      | 19.6        | 3       | 0.3               | 0        |
| Wild rice half          | 50 g         | 48       | 1.1         | 0.8     | 0.1               | 9        |
| White rice              | 55 g         | 63       | 1.3         | 0.2     | 0                 | 18.5     |
| Garden vegetable medley | 113 g        | 40       | 1.7         | 0       | 0                 | 8        |
| Strawberry jello        | 116 g        | 71       | 1           | 0       | 0                 | 17       |
| Vernors ginger ale      | 8 oz can     | 100      | 0           | 0       | 0                 | 26       |
| Raisins                 | 20 g         | 60       | 0.6         | 0       | 0                 | 15       |
| <b>Snacks</b>           |              |          |             |         |                   |          |
| Skim milk               | 236 g carton | 79       | 7.7         | 0.4     | 0.3               | 11       |
| Rice Chex               | 1 bowl       | 70       | 1           | 0       | 0                 | 16       |
| Sugar for cereal        | 2 packets    | 22       | 0           | 0       | 0                 | 6        |
| Banana                  | small        | 90       | 1.1         | 0.3     | 0.1               | 23       |

|                        |            |      |     |     |    |     |
|------------------------|------------|------|-----|-----|----|-----|
| Unsalted crackers      | 2 packages | 50   | 2   | 0   | 0  | 10  |
| Fruit jelly            | 2 packages | 70   | 0   | 0   | 0  | 18  |
| <b>Summary</b>         |            |      |     |     |    |     |
| Provided               |            | 1997 | 80  | 23  | 11 | 375 |
| Percentage of calories |            |      | 16% | 10% | 5% | 75% |
| Goal                   |            | 2000 | 77  | 22  | 11 | 375 |
| Percentage of calories |            |      | 15% | 10% | 5% | 75% |

**H) Sample High Fat Menu #1**

| <b>FOOD</b>                         | <b>AMOUNT</b> | <b>CALORIES</b> | <b>PROTEIN (g)</b> | <b>FAT (g)</b> | <b>SATURATED<br/>FAT (g)</b> | <b>CARB (g)</b> |
|-------------------------------------|---------------|-----------------|--------------------|----------------|------------------------------|-----------------|
| <b>Breakfast</b>                    |               |                 |                    |                |                              |                 |
| Egg omelet with cheese              | 99 g          | 180             | 10                 | 13             | 5                            | 4               |
| Sausage link                        | 2 units       | 146             | 6                  | 13.2           | 5.3                          | 1               |
| Wheat bread for toast               | 1 slice       | 73              | 4                  | 0.3            | 0                            | 14              |
| Butter for bread                    | 10 g          | 72              | 0                  | 8              | 5.1                          | 0               |
| Half and half                       | 30 g          | 39              | 0.9                | 3.5            | 2.2                          | 1.3             |
| <b>Lunch</b>                        |               |                 |                    |                |                              |                 |
| Grilled ham and cheese              | 138 g         | 344             | 20.6               | 17.8           | 10                           | 28              |
| Potato chips                        | 1 bag (28 g)  | 160             | 2                  | 11             | 3                            | 15              |
| <b>Dinner</b>                       |               |                 |                    |                |                              |                 |
| Meatloaf                            | 125 g         | 213             | 15.8               | 11.2           | 4.3                          | 12.3            |
| Macaroni and cheese                 | 95 g          | 180             | 7.8                | 10.8           | 6                            | 12.5            |
| Green beans                         | 91 g          | 25              | 1.4                | 0.2            | 0                            | 6               |
| Butter on beans/macaroni and cheese | 30 g          | 216             | 0.2                | 24.4           | 15.4                         | 0               |
| <b>Snacks</b>                       |               |                 |                    |                |                              |                 |
| Cheesecake                          | 97 g slice    | 291             | 4.7                | 19.7           | 12.5                         | 26              |
| <b>Summary</b>                      |               |                 |                    |                |                              |                 |
| Provided                            |               | 1943            | 74                 | 133            | 69                           | 120             |
| Percentage of calories              |               |                 | 15%                | 62%            | 32%                          | 25%             |
| Goal                                |               | 2000            | 76                 | 133            | 67                           | 125             |
| Percentage of calories              |               |                 | 15%                | 60%            | 30%                          | 25%             |

**I) Sample High Fat Menu #2**

| FOOD                           | AMOUNT        | CALORIES | PROTEIN (g) | FAT (g) | SATURATED FAT (g) | CARB (g) |
|--------------------------------|---------------|----------|-------------|---------|-------------------|----------|
| <b>Breakfast</b>               |               |          |             |         |                   |          |
| Half and half                  | 30 g          | 39       | 0.9         | 3.5     | 2.2               | 1.3      |
| Oatmeal                        | 195 g         | 123      | 3.6         | 2.4     | 0                 | 23       |
| Coconut oil in oatmeal         | 11 g          | 95       | 0           | 11      | 9.5               | 0        |
| Butter in oatmeal              | 10 g          | 72       | 0           | 8.1     | 5.1               | 0        |
| No calorie sweetener           | 1 packet      | 0        | 0           | 0       | 0                 | 0        |
| Vanilla Greek yogurt           | 125 g         | 91       | 10.8        | 0       | 0                 | 12.5     |
| <b>Lunch</b>                   |               |          |             |         |                   |          |
| Caesar salad                   | 100 g         | 49       | 5.1         | 2.9     | 1.8               | 2        |
| Caesar dressing                | 1 packet      | 233      | 1           | 25      | 4                 | 1        |
| Grilled chicken breast         | 75 g          | 95       | 17.2        | 2.6     | 0.3               | 0        |
| Corn                           | 45 g          | 36       | 1.2         | 0.2     | 0.05              | 8.5      |
| Butter on corn and on chicken  | 10 g          | 72       | 0           | 8       | 5.2               | 0        |
| <b>Dinner</b>                  |               |          |             |         |                   |          |
| Potato crusted cod             | 85 g          | 151      | 15.8        | 6       | 2.3               | 7.5      |
| Tartar sauce                   | 1 packet      | 40       | 0           | 4       | 0                 | 2        |
| Baked potato (half)            | 112 g         | 113      | 2.3         | 0.1     | 0                 | 26.1     |
| Sour cream                     | 1 packet      | 60       | 1           | 5       | 3                 | 2        |
| Broccoli                       | 85 g          | 21       | 2.3         | 0.1     | 0                 | 4        |
| Shredded cheddar on vegetables | 29 g          | 113      | 7.1         | 9.1     | 5.1               | 1        |
| Butter on broccoli             | 10 g          | 72       | 0           | 8.1     | 5.1               | 0        |
| Butter in potato               | 14 g          | 100      | 0.1         | 11.4    | 7.2               | 0        |
| <b>Snacks</b>                  |               |          |             |         |                   |          |
| Almond joy                     | 45 g          | 220      | 2           | 13      | 8                 | 26       |
| String cheese                  | 28-29 g stick | 80       | 6           | 6       | 3.5               | 0        |
| Potato chips                   | 1 bag (28 g)  | 160      | 2           | 11      | 3                 | 15       |
| <b>Summary</b>                 |               |          |             |         |                   |          |
| Provided                       |               | 2035     | 78          | 138     | 65                | 132      |
| Percentage of calories         |               |          | 15%         | 61%     | 29%               | 26%      |

|                        |      |     |     |     |     |
|------------------------|------|-----|-----|-----|-----|
| Goal                   | 2000 | 76  | 133 | 67  | 125 |
| Percentage of calories |      | 15% | 60% | 30% | 25% |

**J) Sample High Fat Menu #3**

| FOOD                                 | AMOUNT       | CALORIES | PROTEIN (g) | FAT (g) | SATURATED FAT (g) | CARB (g) |
|--------------------------------------|--------------|----------|-------------|---------|-------------------|----------|
| <b>Breakfast</b>                     |              |          |             |         |                   |          |
| Breakfast wrap                       | 1 (125 g)    | 328      | 16.6        | 16      | 6                 | 29       |
| Half and half                        | 30 g         | 39       | 0.9         | 3.5     | 2.2               | 1.3      |
| <b>Lunch</b>                         |              |          |             |         |                   |          |
| Grilled cheese                       | 1 sandwich   | 343      | 16.3        | 19.2    | 11.1              | 28       |
| Potato chips                         | 1 bag (28 g) | 160      | 2           | 11      | 3                 | 15       |
| <b>Dinner</b>                        |              |          |             |         |                   |          |
| Grilled chicken breast               | 72 g         | 91       | 16.7        | 2.6     | 0.3               | 0        |
| Broccoli                             | 82 g         | 23       | 2.5         | 0.1     | 0                 | 4        |
| Butter on broccoli                   | 15 g         | 108      | 0.1         | 12.2    | 7.7               | 0        |
| Garden vegetable medley              | 57 g         | 21       | 0.9         | 0       | 0                 | 4        |
| Butter in macaroni and cheese        | 15 g         | 108      | 0.1         | 12.2    | 7.7               | 0        |
| Macaroni & cheese                    | 196 g        | 375      | 16.2        | 22.4    | 12.6              | 26       |
| Butter in vegetable                  | 15 g         | 108      | 0.1         | 12.2    | 7.7               | 0        |
| Vegetable oil in macaroni and cheese | 10 g         | 91       | 0           | 10      | 0                 | 0        |
| <b>Snacks</b>                        |              |          |             |         |                   |          |
| Cheesecake                           | 68 g         | 195      | 3.1         | 13.2    | 8.4               | 17       |
| <b>Summary</b>                       |              |          |             |         |                   |          |
| Provided                             |              | 1994     | 76          | 135     | 67                | 124      |
| Percentage of calories               |              |          | 15%         | 61%     | 30%               | 25%      |
| Goal                                 |              | 2000     | 76          | 133     | 67                | 125      |
| Percentage of calories               |              |          | 15%         | 60%     | 30%               | 25%      |

**K) Sample High Fat Menu #4**

| FOOD                       | AMOUNT            | CALORIES | PROTEIN (g) | FAT (g) | SATURATED FAT (g) | CARB (g) |
|----------------------------|-------------------|----------|-------------|---------|-------------------|----------|
| <b>Breakfast</b>           |                   |          |             |         |                   |          |
| Egg omelet with cheese     | 99 g              | 180      | 10          | 13      | 5                 | 4        |
| Sausage link               | 2 units           | 146      | 6           | 13.2    | 5.3               | 1        |
| Half and half              | 30 g              | 39       | 0.9         | 3.5     | 2.2               | 1.3      |
| <b>Lunch</b>               |                   |          |             |         |                   |          |
| Cheesy potato bisque       | 1 serving (170 g) | 180      | 6.5         | 10.4    | 6.5               | 15       |
| Butter in soup             | 10 g              | 72       | 0           | 8       | 5.1               | 0        |
| Roast beef                 | 81 g              | 110      | 10.3        | 4.9     | 1.9               | 4.5      |
| Cheddar cheese             | 23 g              | 84       | 5.3         | 7.3     | 4.6               | 0        |
| Wheat roll                 | 1 (35 g)          | 81       | 3.1         | 0.8     | 0                 | 15       |
| Butter on roll             | 10 g              | 72       | 0           | 8       | 5.1               | 0        |
| Mustard packet             | one               | 3        | 0.2         | 0.2     | 0                 | 0.3      |
| <b>Dinner</b>              |                   |          |             |         |                   |          |
| Meat sauce                 | 113.5 g           | 113      | 7.7         | 5.3     | 0                 | 9        |
| Penne plain                | 99 g              | 159      | 5.3         | 0.8     | 0                 | 32       |
| Butter in penne            | 20 g              | 144      | 0           | 16      | 10.2              | 0        |
| Broccoli                   | 82 g              | 23       | 2.5         | 0.1     | 0                 | 0        |
| Cheddar cheese on broccoli | 23 g              | 84       | 5.5         | 7.3     | 4.6               | 0        |
| Butter in broccoli         | 7 g               | 50       | 0           | 5.6     | 3.6               | 0        |
| <b>Snacks</b>              |                   |          |             |         |                   |          |
| Chocolate cake             | 78 g              | 285      | 3           | 17.7    | 6.9               | 31       |
| <b>Summary</b>             |                   |          |             |         |                   |          |
| Provided                   |                   | 2009     | 77          | 135     | 66                | 118      |
| Percentage of calories     |                   |          | 15%         | 61%     | 30%               | 24%      |
| Goal                       |                   | 2000     | 76          | 133     | 67                | 125      |
| Percentage of calories     |                   |          | 15%         | 60%     | 30%               | 25%      |
