# Supplementary material
Source: MDPI journal article supplement (https://www.mdpi.com/2674-0311/2/4/24)
Supplement: s1 [file s1]

**Supplemental Table S3.** Absolute quantities of calories and macronutrients, stratified by the type of diet. Values are mean  $\pm$  standard deviation. P-value  $< 0.05$  is bolded.

|                               | <b>Provided Intake</b> | <b>Reported Intake</b> | <b>p-value</b> |
|-------------------------------|------------------------|------------------------|----------------|
| <b>standard diet</b>          |                        |                        |                |
| calories (kcal)               | 2676 $\pm$ 498         | 2726 $\pm$ 668         | 0.82           |
| carbohydrates (g)             | 328 $\pm$ 70           | 322 $\pm$ 88           | 0.86           |
| fat (g)                       | 115 $\pm$ 35           | 109 $\pm$ 35           | 0.68           |
| protein (g)                   | 95 $\pm$ 19            | 123 $\pm$ 41           | <b>0.03</b>    |
| <b>high carbohydrate diet</b> |                        |                        |                |
| calories (kcal)               | 2777 $\pm$ 495         | 2823 $\pm$ 991         | 0.88           |
| carbohydrates (g)             | 535 $\pm$ 97           | 479 $\pm$ 171          | 0.32           |
| fat (g)                       | 34 $\pm$ 9             | 55 $\pm$ 21            | <b>0.003</b>   |
| protein (g)                   | 103 $\pm$ 19           | 119 $\pm$ 41           | 0.23           |
| <b>high fat diet</b>          |                        |                        |                |
| calories (kcal)               | 2722 $\pm$ 496         | 2791 $\pm$ 565         | 0.77           |
| carbohydrates (g)             | 173 $\pm$ 33           | 205 $\pm$ 55           | 0.12           |
| fat (g)                       | 185 $\pm$ 34           | 171 $\pm$ 37           | 0.36           |
| protein (g)                   | 101 $\pm$ 18           | 116 $\pm$ 28           | 0.15           |
