# Supplementary material
Source: MDPI journal article supplement (https://www.mdpi.com/2674-0311/2/4/24)
Supplement: s1 [file s1]

**Supplemental Table S5.** Differences between actual and self-reported number of servings of food groups, stratified by experimental diet. P-value  $\leq 0.05$  highlighted in red. Blanks indicate specific food was not in the diet.

| Food group |                                                                      | Standard            |                     |         | HC                  |                     |         | HF                  |                     |         |
|------------|----------------------------------------------------------------------|---------------------|---------------------|---------|---------------------|---------------------|---------|---------------------|---------------------|---------|
|            |                                                                      | Provided (servings) | Reported (servings) | p-value | Provided (servings) | Reported (servings) | p-value | Provided (servings) | Reported (servings) | p-value |
| Fruit      | Citrus Juice                                                         | 1.170               | 1.029               | 0.658   | 1.095               | 1.144               | 0.863   | 0.073               | 0.037               | 0.561   |
|            | Fruit Juice excluding Citrus Juice                                   | 0.076               | 0.152               | 0.659   | 2.203               | 1.899               | 0.473   | 0.037               | 0.073               | 0.564   |
|            | Citrus Fruit                                                         | 0.143               | 0.000               | 0.327   | 0.578               | 0.338               | 0.073   |                     |                     |         |
|            | Fruit excluding Citrus Fruit                                         | 1.433               | 1.217               | 0.548   | 3.891               | 2.856               | 0.029   | 0.165               | 0.127               | 0.676   |
| Vegetables | Dark-green Vegetables                                                | 1.170               | 0.589               | 0.479   | 1.009               | 0.568               | 0.056   | 1.761               | 1.115               | 0.132   |
|            | Deep-yellow Vegetables                                               | 0.135               | 0.029               | 0.139   | 0.495               | 0.367               | 0.331   | 0.142               | 0.089               | 0.411   |
|            | Tomato                                                               | 0.712               | 1.063               | 0.214   | 1.103               | 1.332               | 0.424   | 0.229               | 0.326               | 0.534   |
|            | White Potatoes                                                       | 0.046               | 0.036               | 0.859   | 0.291               | 0.490               | 0.325   | 0.162               | 0.164               | 0.976   |
|            | Other Starchy Vegetables                                             | 0.078               | 0.071               | 0.951   | 0.463               | 0.362               | 0.521   | 0.231               | 0.356               | 0.411   |
|            | Legumes (cooked dried beans)                                         |                     |                     |         | 0.189               | 0.296               | 0.223   |                     |                     |         |
|            | Other Vegetables                                                     | 0.155               | 0.257               | 0.272   | 1.777               | 2.504               | 0.059   | 0.644               | 1.130               | 0.119   |
|            | Vegetable-based Savory Snack                                         | 1.071               | 1.277               | 0.512   | 0.028               | 0.028               | 1.000   | 1.241               | 1.302               | 0.802   |
| Grain      | Grains, Flour and Dry Mixes - Whole Grain                            | 0.238               | 0.286               | 0.899   | 0.371               | 0.444               | 0.760   | 0.345               | 0.707               | 0.199   |
|            | Grains, Flour and Dry Mixes - Refined Grain                          | 0.396               | 0.876               | 0.155   | 0.502               | 0.481               | 0.916   | 0.227               | 0.328               | 0.419   |
|            | Loaf-type Bread and Plain Rolls - Whole Grain                        | 0.449               | 0.107               | 0.300   | 0.479               | 0.521               | 0.873   | 0.170               | 0.340               | 0.378   |
|            | Loaf-type Bread and Plain Rolls - Some Whole Grain                   | 0.000               | 0.214               | 0.178   | 2.069               | 1.095               | 0.016   | 1.000               | 0.920               | 0.783   |
|            | Loaf-type Bread and Plain Rolls - Refined Grain                      | 3.107               | 2.993               | 0.862   | 0.638               | 1.365               | 0.028   | 1.386               | 1.429               | 0.916   |
|            | Other Breads (quick breads, corn muffins, tortillas) - Refined Grain | 2.714               | 2.040               | 0.303   | 0.904               | 0.728               | 0.506   | 0.517               | 0.323               | 0.359   |
|            | Crackers - Refined Grain                                             |                     |                     |         | 0.805               | 0.508               | 0.058   | 0.029               | 0.015               | 0.561   |
|            | Pasta - Refined Grain                                                | 1.571               | 1.976               | 0.298   | 0.834               | 1.298               | 0.094   | 0.834               | 1.636               | 0.012   |
|            | Ready-to-eat Cereal (not presweetened) - Whole Grain                 | 0.096               | 0.088               | 0.956   | 0.298               | 0.376               | 0.596   |                     |                     |         |

|                  |                                                                                   |       |       |       |       |       |       |       |       |       |
|------------------|-----------------------------------------------------------------------------------|-------|-------|-------|-------|-------|-------|-------|-------|-------|
|                  | Cakes, Cookies, Pies, Pastries, Danish, Doughnuts and Cobblers - Some Whole Grain | 0.033 | 0.033 | 1.000 | 0.039 | 0.039 | 1.000 | 0.262 | 0.497 | 0.101 |
|                  | Cakes, Cookies, Pies, Pastries, Danish, Doughnuts and Cobblers - Refined Grain    | 0.326 | 0.184 | 0.496 | 0.413 | 0.144 | 0.012 | 0.462 | 0.266 | 0.306 |
|                  | Snack Chips - Refined Grain                                                       |       |       |       | 0.917 | 0.627 | 0.082 | 0.000 | 0.034 | 0.322 |
| Meats            | Beef                                                                              |       |       |       | 0.316 | 1.418 | 0.000 | 1.563 | 1.624 | 0.910 |
|                  | Lean Beef                                                                         |       |       |       | 0.543 | 0.048 | 0.000 |       |       |       |
|                  | Lean Cured Pork                                                                   | 0.146 | 0.000 | 0.153 | 0.028 | 0.361 | 0.049 | 0.552 | 0.518 | 0.903 |
|                  | Poultry                                                                           | 0.104 | 0.000 | 0.327 |       |       |       |       |       |       |
|                  | Lean Poultry                                                                      | 2.454 | 5.362 | 0.001 | 1.732 | 2.934 | 0.034 | 1.625 | 2.007 | 0.495 |
|                  | Lean Fish - Fresh and Smoked                                                      | 0.252 | 0.429 | 0.725 | 0.480 | 0.765 | 0.422 | 0.862 | 1.417 | 0.334 |
|                  | Fried Fish - Commercial Entrée and Fast Food                                      |       |       |       |       |       |       | 0.000 | 0.208 | 0.078 |
|                  | Cold Cuts and Sausage                                                             | 0.151 | 0.101 | 0.740 |       |       |       | 1.155 | 0.946 | 0.438 |
|                  | Lean Cold Cuts and Sausage                                                        | 0.202 | 0.336 | 0.628 | 1.201 | 1.033 | 0.715 | 0.000 | 0.586 | 0.075 |
| Non-meat protein | Eggs                                                                              | 1.311 | 1.409 | 0.788 | 0.439 | 0.782 | 0.053 | 0.979 | 1.211 | 0.385 |
|                  | Egg Substitute                                                                    | 0.000 | 0.071 | 0.327 | 0.315 | 0.039 | 0.022 |       |       |       |
|                  | Nuts and Seeds                                                                    | 0.292 | 0.245 | 0.903 |       |       |       |       |       |       |
|                  | Nut and Seed Butters                                                              |       |       |       |       |       |       | 0.194 | 0.207 | 0.949 |
|                  | Meat Alternatives                                                                 | 1.789 | 1.905 | 0.809 |       |       |       | 0.000 | 0.122 | 0.155 |
| Dairy            | Milk - Whole                                                                      | 0.071 | 0.000 | 0.327 |       |       |       |       |       |       |
|                  | Milk - Reduced Fat                                                                | 0.038 | 0.000 | 0.178 | 0.024 | 0.024 | 0.985 | 0.255 | 0.197 | 0.462 |
|                  | Milk - Low Fat and Fat Free                                                       | 0.000 | 0.087 | 0.236 | 1.894 | 1.256 | 0.003 | 0.010 | 0.057 | 0.165 |
|                  | Cheese - Full Fat                                                                 | 1.365 | 1.187 | 0.516 | 0.211 | 0.467 | 0.044 | 1.895 | 1.766 | 0.424 |
|                  | Cheese - Reduced Fat                                                              | 0.466 | 0.932 | 0.045 | 0.061 | 0.150 | 0.194 | 0.072 | 0.239 | 0.147 |
|                  | Cheese - Low Fat and Fat Free                                                     |       |       |       | 0.005 | 0.000 | 0.084 |       |       |       |
|                  | Yogurt - Sweetened Low Fat                                                        | 0.050 | 0.107 | 0.536 | 0.031 | 0.331 | 0.005 | 0.000 | 0.097 | 0.047 |
|                  | Yogurt - Sweetened Fat Free                                                       | 0.149 | 0.000 | 0.178 | 0.145 | 0.094 | 0.525 | 0.144 | 0.045 | 0.169 |
|                  | Frozen Dairy Dessert                                                              | 1.055 | 0.516 | 0.145 | 1.455 | 1.275 | 0.544 | 0.123 | 0.103 | 0.839 |
|                  | Frozen Nondairy Dessert                                                           | 0.041 | 0.214 | 0.434 | 0.286 | 0.303 | 0.873 |       |       |       |

|           |                                                       |       |       |       |       |       |       |        |       |       |
|-----------|-------------------------------------------------------|-------|-------|-------|-------|-------|-------|--------|-------|-------|
|           | Pudding and Other Dairy Dessert                       |       |       |       | 0.081 | 0.052 | 0.443 | 0.030  | 0.051 | 0.504 |
|           | Cream                                                 | 0.133 | 0.068 | 0.668 | 0.060 | 0.058 | 0.965 | 0.257  | 0.162 | 0.423 |
| Additives | Margarine - Regular                                   | 0.000 | 0.143 | 0.327 |       |       |       | 0.106  | 0.063 | 0.531 |
|           | Margarine - Reduced Fat                               | 2.312 | 3.933 | 0.062 | 0.094 | 1.016 | 0.001 | 2.671  | 4.420 | 0.052 |
|           | Oil                                                   | 0.606 | 1.313 | 0.260 | 0.220 | 0.233 | 0.872 | 0.649  | 0.464 | 0.504 |
|           | Shortening                                            | 0.000 | 0.065 | 0.224 | 0.000 | 0.195 | 0.006 | 0.091  | 0.211 | 0.436 |
|           | Butter and Other Animal Fats - Regular                | 6.495 | 2.107 | 0.000 | 0.310 | 0.198 | 0.562 | 14.226 | 9.576 | 0.001 |
|           | Salad Dressing - Regular                              | 0.262 | 0.320 | 0.835 | 0.000 | 0.271 | 0.000 | 0.374  | 0.330 | 0.810 |
|           | Salad Dressing - Reduced Fat/Reduced Calorie/Fat Free | 1.029 | 0.571 | 0.141 | 0.827 | 0.255 | 0.001 | 0.138  | 0.083 | 0.511 |
|           | Sugar                                                 | 0.466 | 0.460 | 0.972 | 1.670 | 1.150 | 0.332 | 0.063  | 0.114 | 0.466 |
|           | Sugar Substitute                                      | 0.143 | 0.000 | 0.327 |       |       |       | 0.552  | 1.276 | 0.196 |
|           | Chocolate Candy                                       | 0.161 | 0.163 | 0.992 |       |       |       | 0.284  | 0.314 | 0.851 |
|           | Non-chocolate Candy                                   | 0.082 | 0.035 | 0.606 | 0.163 | 0.271 | 0.443 |        |       |       |
|           | Sauces and Condiments - Regular                       | 0.166 | 0.037 | 0.298 | 0.035 | 0.013 | 0.564 | 0.110  | 0.176 | 0.474 |
|           | Sauces and Condiments - Reduced Fat                   | 0.386 | 0.209 | 0.563 | 0.623 | 0.515 | 0.599 | 0.642  | 0.694 | 0.815 |
