# Supplementary material
Source: MDPI journal article supplement (https://www.mdpi.com/2674-0311/2/4/24)
Supplement: s1 [file s1]

**Supplemental Table S4.** Percent of caloric intake of saturated, monounsaturated, and polyunsaturated fatty acids, stratified by the type of diet. Values are mean ± standard deviation. P-value < 0.05 is bolded.

|                         | Provided Percent Intake | Reported Percent Intake | p-value         |
|-------------------------|-------------------------|-------------------------|-----------------|
| standard diet           |                         |                         |                 |
| saturated fat (%)       | 15.6 ± 4.1              | 12.7 ± 3.8              | 0.06            |
| monounsaturated fat (%) | 11.0 ± 1.0              | 10.8 ± 1.8              | 0.82            |
| polyunsaturated fat (%) | 7.4 ± 1.4               | 8.2 ± 1.5               | 0.18            |
| high carbohydrate diet  |                         |                         |                 |
| saturated fat (%)       | 3.8 ± 1.0               | 6.2 ± 0.8               | <b>7.80E-07</b> |
| monounsaturated fat (%) | 3.3 ± 0.6               | 5.7 ± 0.8               | <b>2.14E-09</b> |
| polyunsaturated fat (%) | 2.4 ± 0.4               | 3.5 ± 0.8               | <b>0.0004</b>   |
| high fat diet           |                         |                         |                 |
| saturated fat (%)       | 27.7 ± 1.3              | 22.7 ± 3.3              | <b>0.0002</b>   |
| monounsaturated fat (%) | 18.0 ± 1.6              | 16.8 ± 1.7              | 0.10            |
| polyunsaturated fat (%) | 9.2 ± 1.6               | 9.6 ± 1.7               | 0.63            |
